# Supplementary material
Source: publisher figshare collection journal article supplement (https://acs.figshare.com/ndownloader/files/5169496)
Supplement: Supplementary file 1 [file 5169496]

## Supplementary Data

### Synthesis of G1-SS-G1

Cystamine dihydrochloride (160 mg, 0.72 mmol) was suspended in EtOAc (15 ml). Triethylamine (0.21 ml, 1.52 mmol) was added, followed by first generation dendritic branch (0.53 g, 1.52 mmol). The reaction mixture was stirred under N<sub>2</sub> for 3 minutes before being cooled to 0°C. DCC (310 mg, 1.52 mmol) and HOBt (206 mg, 1.52 mmol) were added simultaneously as a mixture of solids. The reaction mixture was allowed to warm to room temperature and was stirred for 48 h. The precipitate was removed via filtration. The filtrate was washed with an aqueous saturated solution of sodium hydrogen carbonate, aqueous sodium hydrogen sulfate (8 g in 50 ml), then washed again with aqueous sodium hydrogen carbonate and finally water and brine. The solution was dried over sodium sulfate then rotary evaporated to produce a pale yellow solid (491 mg, 83 %). No further purification was required. R<sub>f</sub> 0.54 (CH<sub>2</sub>Cl<sub>2</sub>:MeOH 90:10), Melting point: 88-90°C;  $\alpha_D^{293} +18.9$  (c = 1.0, CHCl<sub>3</sub>), +19.23 (c = 1.0, MeOH); *m/z* (ES+) C<sub>36</sub>H<sub>68</sub>N<sub>6</sub>O<sub>10</sub>S<sub>2</sub> [M]<sup>+</sup> requires 808.3; found 831.3 (100%, [M+Na]<sup>+</sup>); HR FAB-MS calculated for C<sub>36</sub>H<sub>68</sub>N<sub>6</sub>O<sub>10</sub>Na<sub>1</sub>S<sub>2</sub> 831.4336; found 831.4338;  $\delta_H$  (270 MHz, CD<sub>3</sub>OCD<sub>3</sub>) 7.70 (2H, t, J 7.5, CONH), 6.15 (2H, t, J 8.0, CONH), 5.98 (2H, t, J 7.5, CONH), 4.10-4.08 (2H, m, COCH), 3.54-3.51 (4H, m, SCH<sub>2</sub>CH<sub>2</sub>NH), 3.06 (4H, q, J 6.5, CH<sub>2</sub>CH<sub>2</sub>NH), 2.86 (4H, t, J 6.5, SCH<sub>2</sub>CH<sub>2</sub>NH), 1.9-1.37 (48H, m, CH<sub>2</sub>, CH<sub>3</sub>);  $\delta_C$  (67.9 MHz, D<sub>2</sub>O) 173.4 (NHCOCH x 2), 156.6 (NHCOO x 2), 156.3 (NHCOO x 2), 79.1 (OC(CH<sub>3</sub>)<sub>3</sub> x 2), 78.2 (OC(CH<sub>3</sub>)<sub>3</sub> x 2), 55.3 (NHCOCH x 2), 40.6 (SCH<sub>2</sub>CH<sub>2</sub>NH x 2), 38.9 (CH<sub>2</sub>CH<sub>2</sub>NH x 2), 38.3 (SCH<sub>2</sub>CH<sub>2</sub>NH x 2), 33.0 (CH<sub>2</sub> x 4), 28.5 (CCH<sub>3</sub> x 6), 28.4 (CCH<sub>3</sub> x 6), 23.5 (CH<sub>2</sub> x 2);  $\nu_{max}$  (KBr disc) 3346 cm<sup>-1</sup> (CONH),

2978m, 2935m, 2863w (CH<sub>2</sub>, CH<sub>3</sub>), 1687s (CONH), 1656s (CONH), 1524s (CONH), 1366m (C(CH<sub>3</sub>)).

### Synthesis of G2-SS-G2

Cystamine dihydrochloride (13 mg, 0.06 mmol) was suspended in EtOAc (5 ml). Triethylamine (18  $\mu$ l, 0.12 mmol) was added, followed by the second generation dendritic branch (100 mg, 0.12 mmol). The reaction mixture was stirred under N<sub>2</sub> for 3 minutes before being cooled to 0°C. DCC (25 mg, 0.12 mmol) and HOBT (17 mg, 0.12 mmol) were added simultaneously as a mixture of solids. The reaction mixture was allowed to warm to room temperature and was stirred for 4 days. The precipitate was removed via filtration. The filtrate was then washed with an aqueous saturated solution of sodium hydrogen carbonate, aqueous sodium hydrogen sulfate (8 g in 50 ml), then washed again with aqueous sodium hydrogen carbonate and finally water and brine. The solution was dried over sodium sulfate then rotary evaporated to produce 130 mg of a yellow/white solid. The resulting solid was purified using preparative GPC (CH<sub>2</sub>Cl<sub>2</sub>:MeOH, 90:10) to yield a white solid (40 mg, 39 %). R<sub>f</sub> 0.42 (CH<sub>2</sub>Cl<sub>2</sub>:MeOH 90:10); Melting point: 120-122°C;  $\alpha_D^{293} +23.3$  (c = 1.0, CHCl<sub>3</sub>), +20.3 (c = 1.0, MeOH); *m/z* (ES+) C<sub>80</sub>H<sub>148</sub>N<sub>14</sub>O<sub>22</sub>S<sub>2</sub> [M]<sup>+</sup> requires 1720.7; found 1743.7 (100%, [M+Na]<sup>+</sup>), 883.6 (12%, [M+2Na]<sup>2+</sup>);  $\delta_H$  (270 MHz, CDCl<sub>3</sub>) 7.65 (2H, br s, CONH), 7.42 (4H, br s, CONH), 5.86 (2H, br s, NHBoc), 5.70 (2H, br s, NHBoc), 5.06 (2H, br s, NHBoc), 4.98 (2H, br s, NHBoc), 4.50-4.23 (6H, br m, COCH(R)NH), 3.60-3.52 (4H, br m, SCH<sub>2</sub>CH<sub>2</sub>NH), 3.32-3.30 (4H, br m, CH<sub>2</sub>CH<sub>2</sub>NH), 3.10-3.05 (8H, br m, CH<sub>2</sub>CH<sub>2</sub>NH), 2.80-2.75 (4H, br m, SCH<sub>2</sub>CH<sub>2</sub>NH), 1.79-1.16 (108H, br m, CH<sub>2</sub>, CH<sub>3</sub>),  $\delta_C$  (67.9 MHz, CDCl<sub>3</sub>) 173.6 (CONH x 4), 172.7 (CONH x 2), 156.6

(NHCOC(Me)<sub>3</sub> x 8), 80.1 (OC(Me)<sub>3</sub> x 4), 79.2 (OC(Me)<sub>3</sub> x 4), 54.4 (COCH(R)NH x 4), 54.2 (COCH(R)NH x 2), 40.3 (CH<sub>2</sub>CH<sub>2</sub>NH x 4), 39.2 (CH<sub>2</sub>CH<sub>2</sub>NH x 2), 38.8 (CH<sub>2</sub>CH<sub>2</sub>NH x 2), 38.7 (SCH<sub>2</sub>CH<sub>2</sub> x 2), 29.8(CH<sub>2</sub> x 6), 28.8 (CCH<sub>3</sub> x 24), 23.1 (CH<sub>2</sub> x 6), 23.0 (CH<sub>2</sub> x 6);  $\nu_{\max}$  (KBr disc) 3297m (CONH), 2978m, 2935m (CH<sub>2</sub>, CH<sub>3</sub>), 2865w (CH), 1690s (OCONH), 1655s (CONH), 1523s (CONH), 1458w (CH<sub>2</sub>, CH<sub>3</sub>), 1366m (C(CH<sub>3</sub>)<sub>3</sub>), 1250m, 1715s (COO).

### Synthesis of G3-SS-G3

Cystamine dihydrochloride (31 mg, 0.13 mmol) was suspended in EtOAc (5 ml). Triethylamine (40  $\mu$ l, 0.29 mmol) was added, followed by the third generation dendritic branch (500 mg, 0.29 mmol). The reaction mixture was stirred under N<sub>2</sub> for 3 minutes before being cooled to 0°C. DCC (60 mg, 0.29 mmol) and HOBT (39 mg, 0.29 mmol) were added simultaneously as a mixture of solids. The reaction mixture was allowed to warm to room temperature and was stirred for 4 days. The precipitate was removed via filtration. The filtrate was then washed with an aqueous saturated solution of sodium hydrogen carbonate, aqueous sodium hydrogen sulfate (8 g in 50 ml), then washed again with aqueous sodium hydrogen carbonate and finally water and brine. The solution was dried over sodium sulfate then rotary evaporated to produce 200 mg of a yellow/white solid. The resulting solid was purified using preparative GPC (CH<sub>2</sub>Cl<sub>2</sub>:MeOH, 90:10) to yield a white solid (160 mg, 34 %).  $R_f$  0.30 (CH<sub>2</sub>Cl<sub>2</sub>:MeOH 90:10); Melting point: 119-121 °C;  $\alpha_D^{293}$  -14.4 (c = 1.0, MeOH);  $m/z$  (ES+) C<sub>168</sub>H<sub>308</sub>N<sub>30</sub>O<sub>46</sub>S<sub>2</sub> [M]<sup>+</sup> requires 3548.4; found 1797.1 (100%, [M+2Na]<sup>2+</sup>), 1205.4 (55 %, [M+3Na]<sup>3+</sup>);  $\delta_H$  (270 MHz, CD<sub>3</sub>OD) 4.29 (6H, m, COCH(R)NH), 4.00 (8H, m, COCH(R)NH), 3.49 (4H, m, SCH<sub>2</sub>CH<sub>2</sub>NH), 3.18 (12H, m, CH<sub>2</sub>CH<sub>2</sub>NH), 3.03

(16H, m,  $\text{CH}_2\text{CH}_2\text{NH}$ ), 2.84 (4H, m,  $\text{SCH}_2\text{CH}_2\text{NH}$ ), 1.80-1.30 (228H, m,  $\text{CH}_2$ ,  $\text{CH}_3$ );  
 $\delta_{\text{c}}$  (67.9 MHz,  $\text{CD}_3\text{OD}$ ) 175.2, 175.0, 172.2, 174.0 ( $\text{CONH} \times 14$ ), 158.5  
( $\text{NHCOOC}(\text{Me})_3 \times 12$ ), 157.8 ( $\text{NHCOOC}(\text{Me})_3 \times 4$ ), 80.6 ( $\text{OC}(\text{Me})_3 \times 4$ ), 80.5  
( $\text{OC}(\text{Me})_3 \times 4$ ), 79.8 ( $\text{OC}(\text{Me})_3 \times 8$ ), 56.3, 56.2, 54.8, 54.7, 54.6 (All  $\text{COCH}(\text{R})\text{NH} \times$   
14), 41.0 ( $\text{CH}_2\text{CH}_2\text{NH} \times 8$  and  $\text{SCH}_2\text{CH}_2\text{NH} \times 2$ ), 40.1 ( $\text{CH}_2\text{NH} \times 6$  and  $\text{SCH}_2\text{CH}_2\text{NH}$   
 $\times 2$ ), 33.3, 32.9, 32.8, 32.6, 30.6, 30.0 (All  $\text{CH}_2$ ), 28.9 ( $\text{CH}_3 \times 48$ ), 24.2 ( $\text{CH}_2$ );  $\nu_{\text{max}}$   
(KBr disc) 3310m ( $\text{CONH}$ ), 2977m, 2935m ( $\text{CH}_2$ ,  $\text{CH}_3$ ), 2866w ( $\text{CH}$ ), 1691s  
( $\text{CONH}$ ), 1655s ( $\text{CONH}$ ), 1523 s ( $\text{CONH}$ ), 1458w ( $\text{CH}_2$ ,  $\text{CH}_3$ ), 1366m ( $\text{C}(\text{Me})_3$ ),  
1250m ( $\text{COO}$ ), 1172m ( $\text{COO}$ ).
